# Supplementary material
Source: publisher figshare collection journal article supplement (https://tandf.figshare.com/articles/dataset/_/13627580)
Supplement: Supplementary file 1 [file 1]

## Supplementary data

**Table S1.** Auto-pharmacophore generated best hypotheses for epalrestat and HNE.

| Generated hypotheses | Features (ALR2; Epalrestat) | Features (ALR1; HNE) |
|----------------------|-----------------------------|----------------------|
| Pharmacophore 1      | 3HBA, 1H, 1NI, 1RA          | 1HBA, 1HBD, 1H       |
| Pharmacophore 2      | 3HBA, 2H, 1NI               | 1HBA, 1HBD, 1H       |
| Pharmacophore 3      | 2HBA, 1H, 1NI, 1RA          | 2HBA, 1H             |
| Pharmacophore 4      | 2HBA, 2H, 1NI               | 2HBA, 1H             |
| Pharmacophore 5      | 3HBA, 1NI, 1RA              | -                    |
| Pharmacophore 6      | 3HBA, 1H, 1NI               | -                    |
| Pharmacophore 7      | 2HBA, 1H, 1NI, 1RA          | -                    |
| Pharmacophore 8      | 2HBA, 2H, 1NI               | -                    |
| Pharmacophore 9      | 3HBA, 1H, 1NI               | -                    |
| Pharmacophore 10     | 2HBA, 2H, 1NI               | -                    |

HBA = Hydrogen bond acceptor, HBD = Hydrogen bond donor, H = Hydrophobic, NI = Negative ionizable, RA = Ring aromatic

**Table S2.** PAINS filter results, docking scores and binding affinities of 12 hits with the catalytic domain of ALR1 (3H4G).

| Sr. No | Compound ID   | Structure                                                                           | PAINS filter | CDOCKER energy (kcal/mol) | CDOCKER interaction energy (kcal/mol) | Binding energy (MM-GBSA score, kcal/mol) | Key interactions      |
|--------|---------------|-------------------------------------------------------------------------------------|--------------|---------------------------|---------------------------------------|------------------------------------------|-----------------------|
| 5      | STOCK1N-88220 | 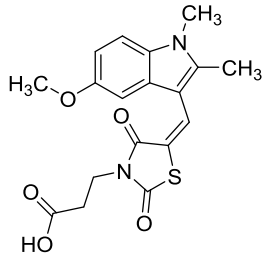 | Passed       | -16.78                    | -38.83                                | -35.19                                   | Trp22, Met302, Arg312 |
| 7      | STOCK1N-44092 |  | Passed       | -24.13                    | -45.09                                | -48.14                                   | Lys23                 |
| 8      | STOCK1N-46096 |  | Passed       | -11.35                    | -38.45                                | -47.67                                   | Lys23                 |
| 9      | STOCK1N-44771 |  | Passed       | -21.54                    | -40.53                                | -39.89                                   | Trp22, Lys23          |

|    |               |                                                                                     |        |        |        |        |                |
|----|---------------|-------------------------------------------------------------------------------------|--------|--------|--------|--------|----------------|
| 11 | STOCK1N-44713 | 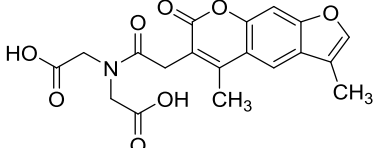   | Passed | -28.90 | -42.91 | -42.07 | Lys23, Ala219  |
| 12 | STOCK1N-46041 |    | Passed | -28.55 | -44.37 | -30.99 | Lys127, Arg312 |
| 13 | STOCK1N-59369 |    | Passed | ND*    | ND*    | ND*    | ND*            |
| 14 | STOCK1N-43987 |    | Passed | -23.95 | -46.00 | -35.60 | Trp22, Arg312  |
| 19 | STOCK1N-57572 |   | Passed | -26.67 | -41.40 | -53.59 | Lys23, Ala219  |
| 20 | STOCK1N-31184 |  | Failed | -11.04 | -28.45 | -38.35 | -              |
| 23 | STOCK1N-46421 |  | Passed | -35.55 | -46.55 | -59.89 | Lys127, Arg312 |
| 30 | STOCK1N-69620 |  | Passed | -11.47 | -43.73 | -53.19 | Lys23          |
|    | Epalrestat    |  | Failed | -16.94 | -47.90 | -65.13 | Lys127         |

\*Not Docked (ND)

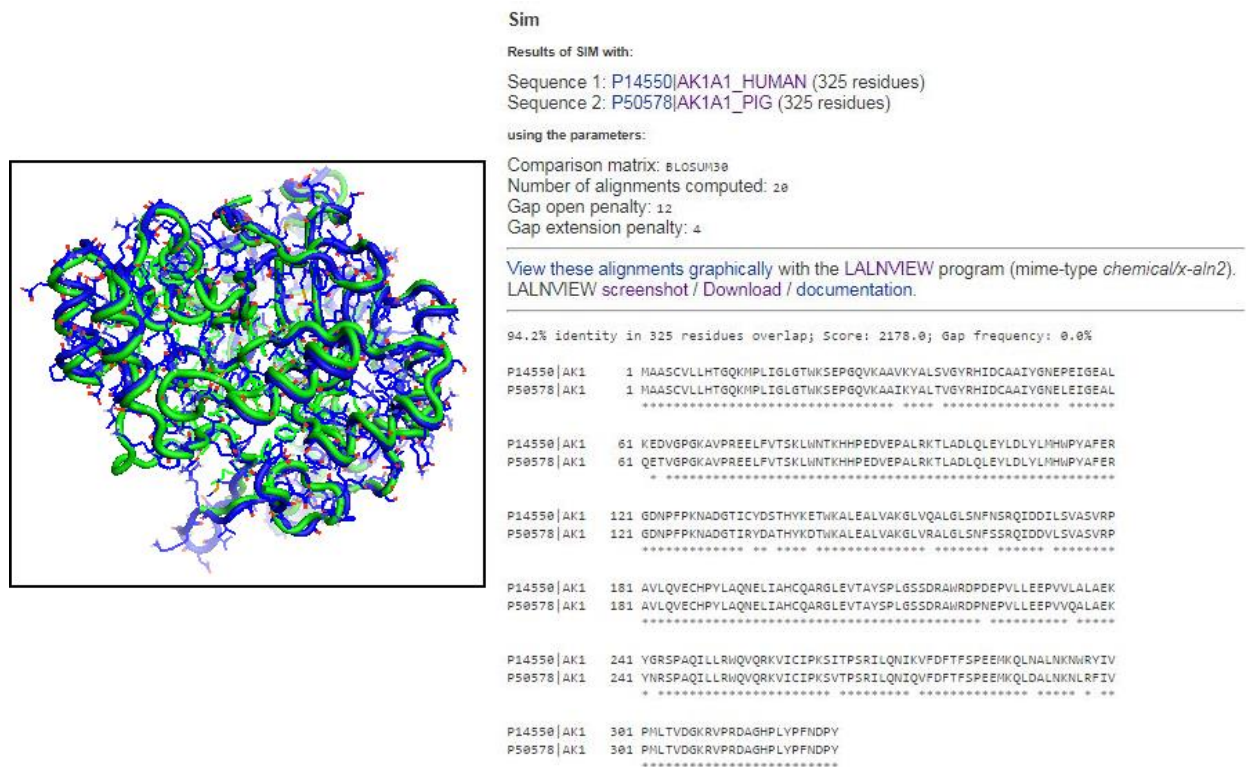

**Figure S1.** Aligned pose of ALR1 enzyme from porcine, in green; Homo sapiens, in blue (left) and similarity search data generated with SIM webserver (right).

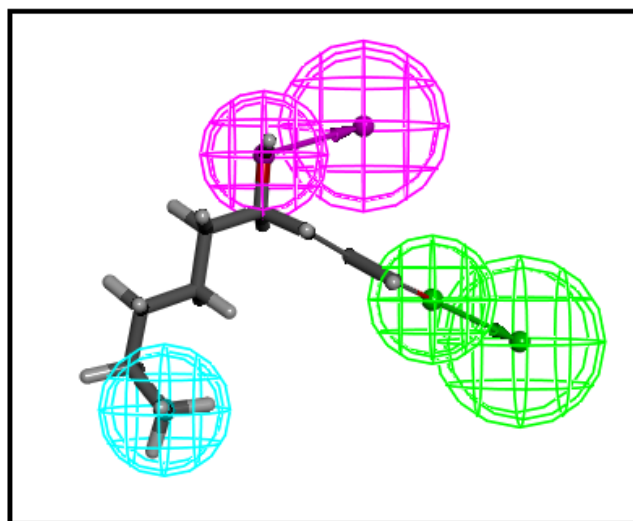

**Figure S2.** HNE mapped auto-pharmacophore showing key pharmacophoric features.

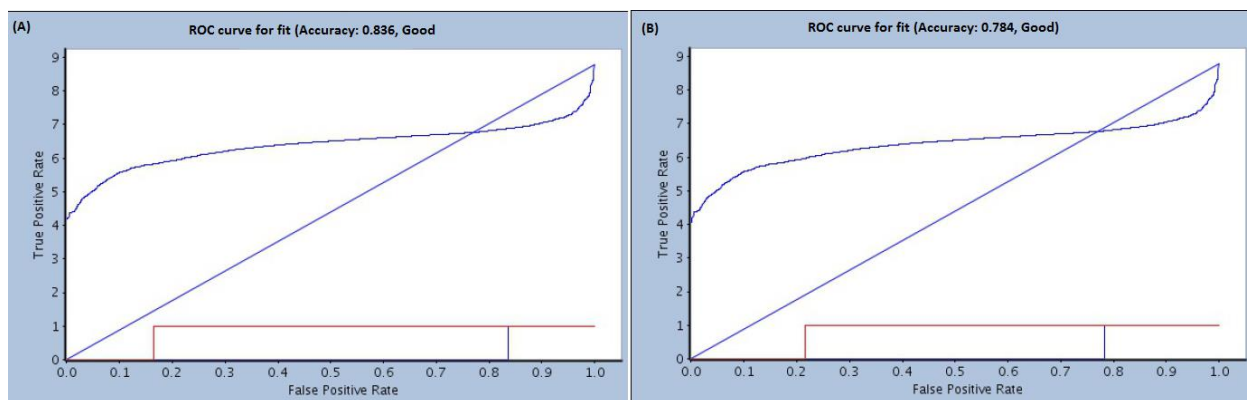

**Figure S3.** AUC score calculated on the basis of ROC analysis of the auto-pharmacophore of epalrestat (A) and HNE (B).

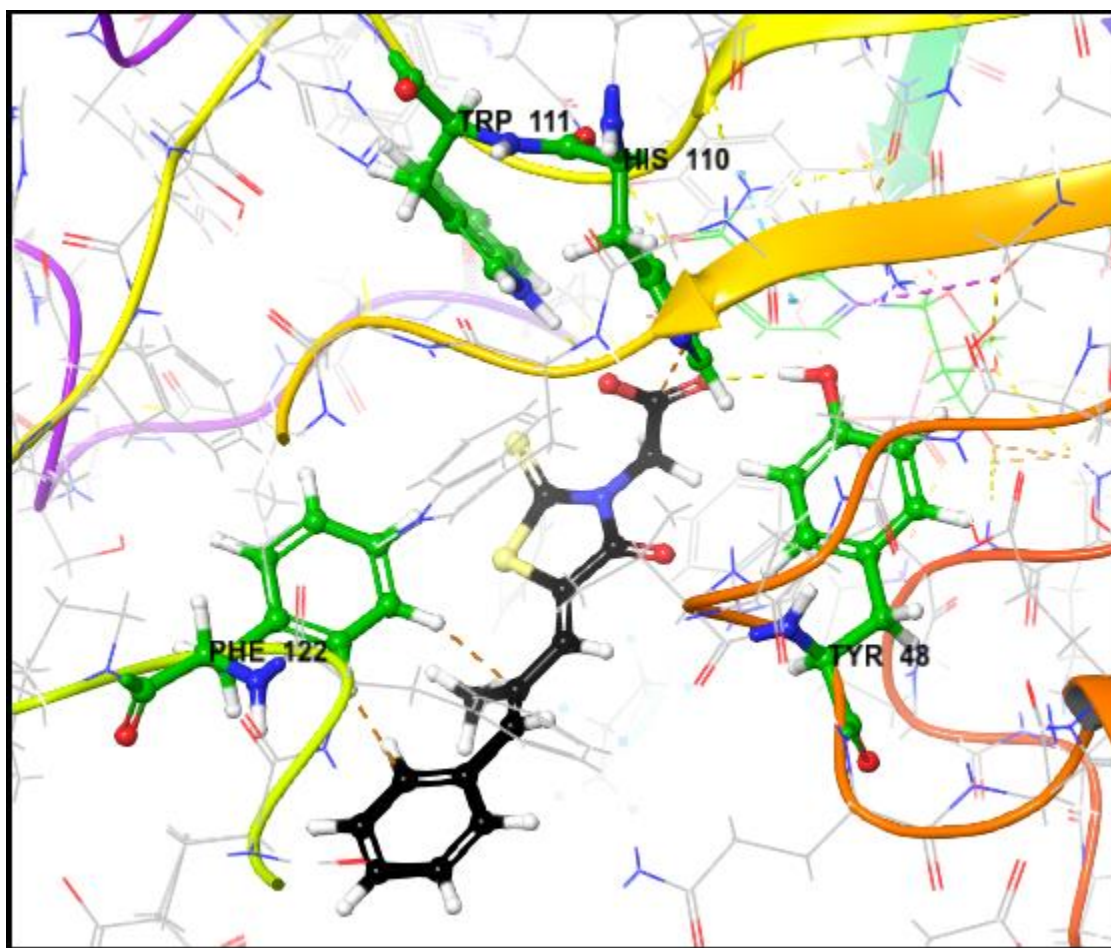

**Figure S4.** Docking pose showing key residue interaction of epalrestat with ALR2 protein.

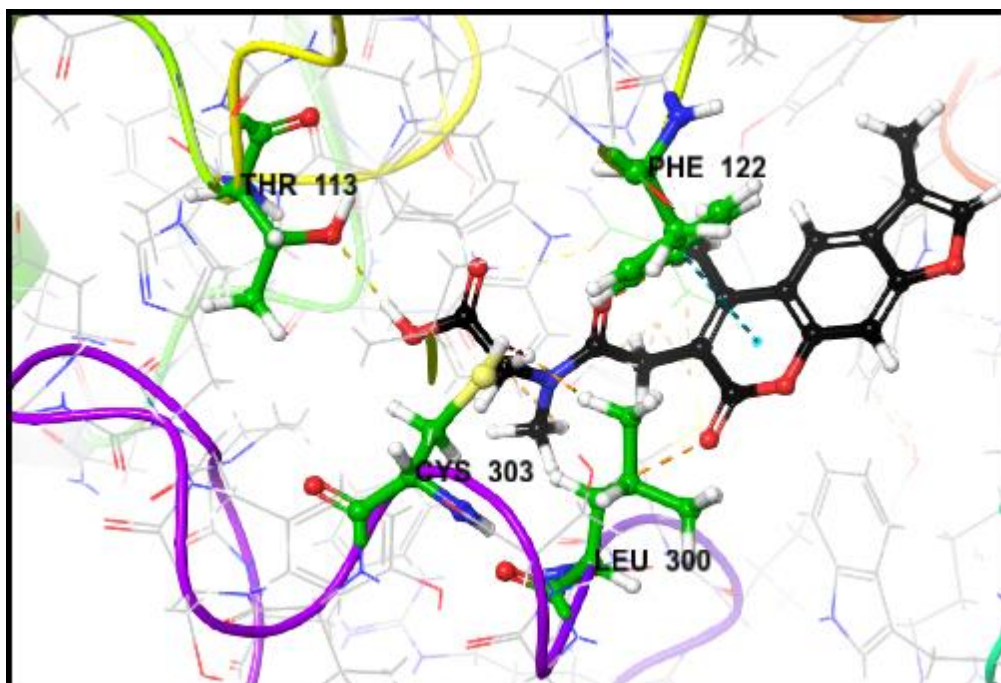

**Figure S5.** Docking pose showing key residue interaction of STOCKIN-44771 with ALR2 protein.

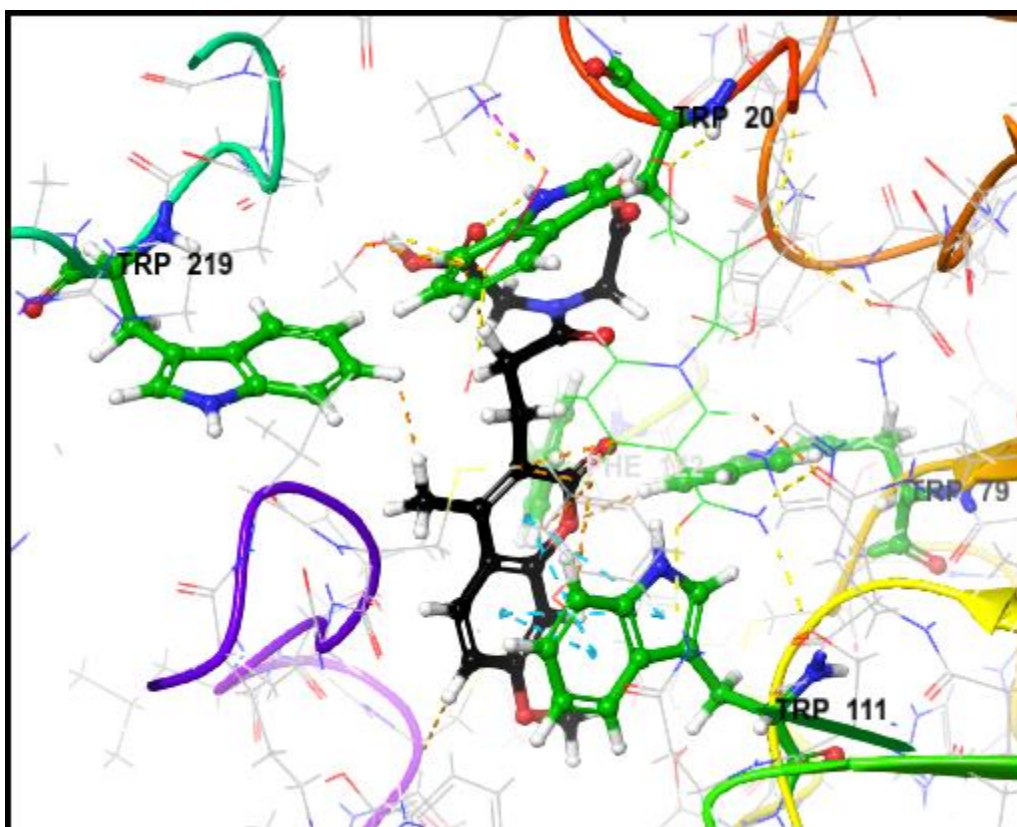

**Figure S6.** Docking pose showing key residue interaction of STOCKIN-46041 with ALR2 protein.

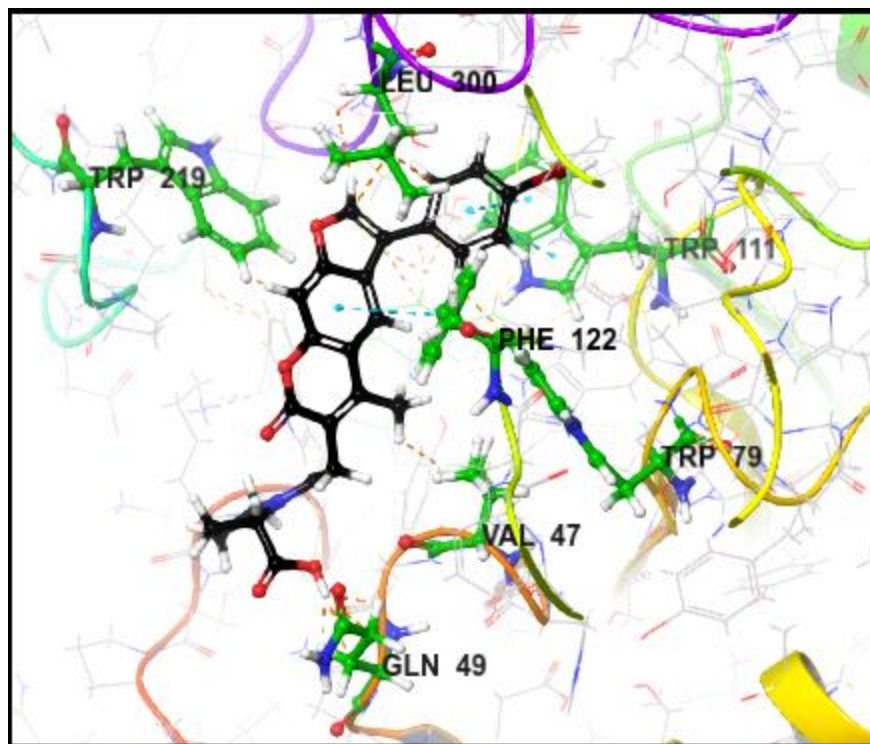

**Figure S7.** Docking pose showing key residue interaction of STOCKIN-59369 with ALR2 protein.

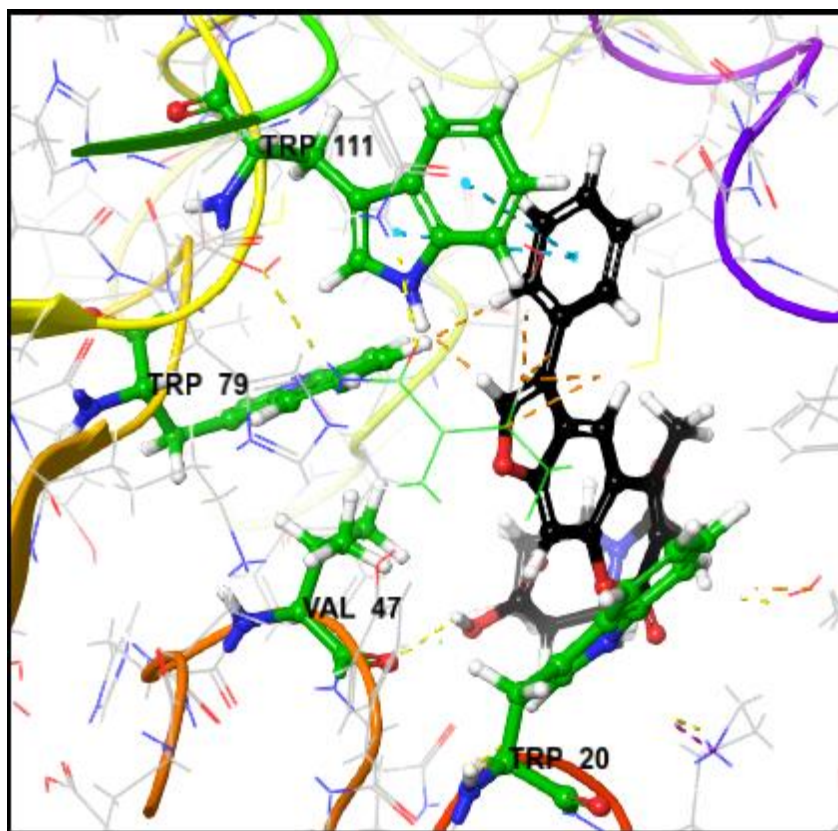

**Figure S8.** Docking pose showing key residue interaction of STOCKIN-69620 with ALR2 protein.

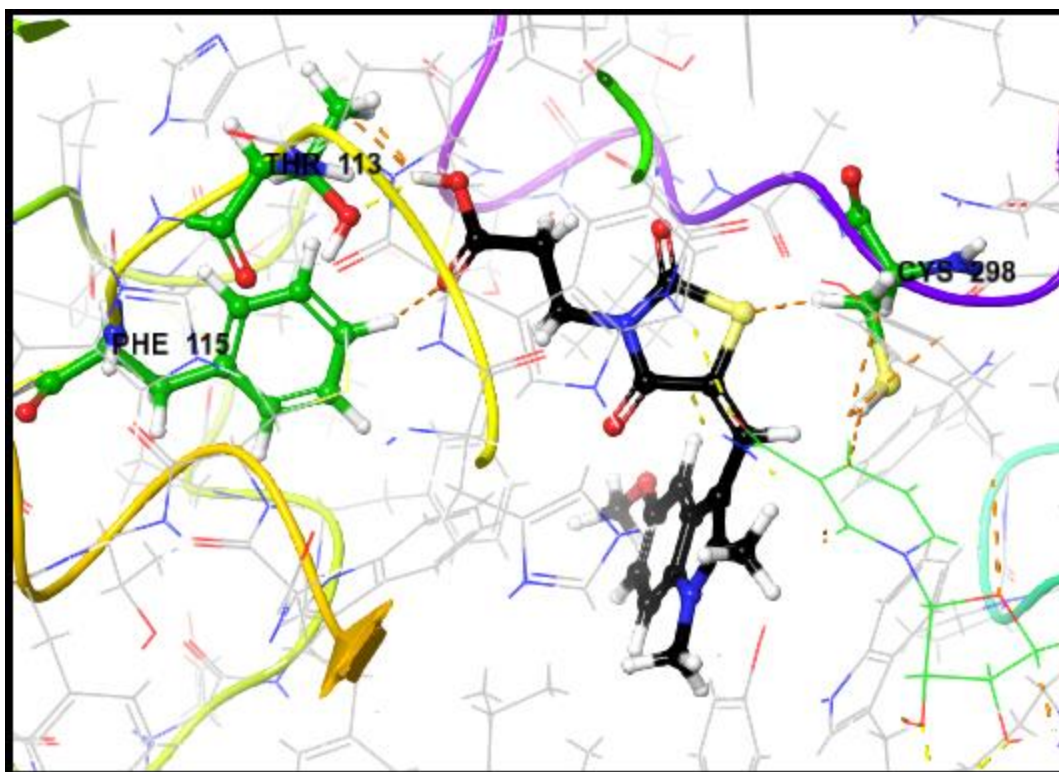

**Figure S9.** Docking pose showing key residue interaction of STOCKIN-88220 with ALR2 protein.

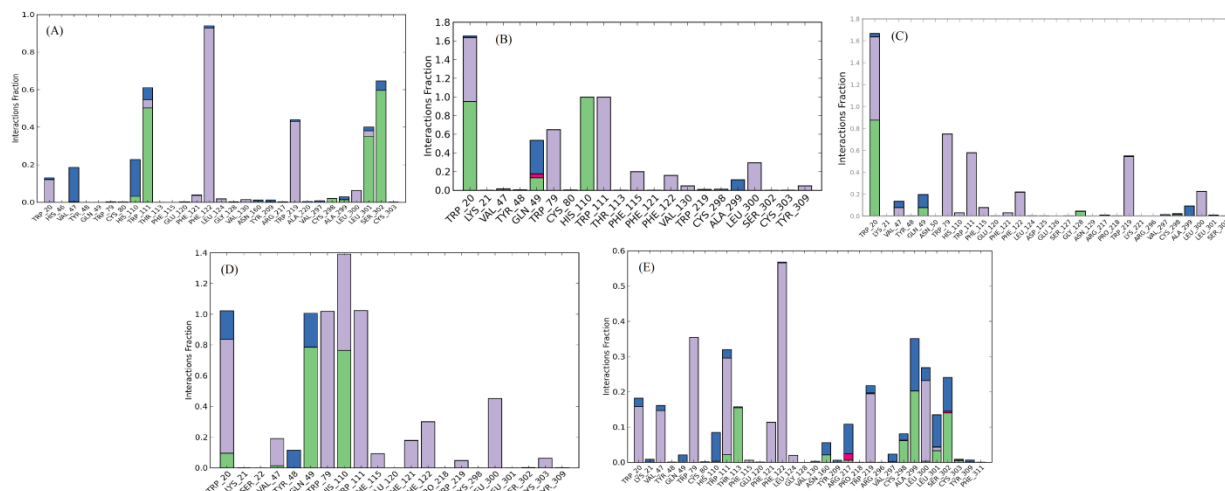

**Figure S10.** Histogram representing the interaction fractions of top five hits (A) STOCKIN-44771, (B) STOCKIN-46041, (C) STOCKIN-59369, (D) STOCKIN-69620, (E) STOCKIN-88220 in the catalytic domain of ALR2 throughout the simulation period of 50 ns.

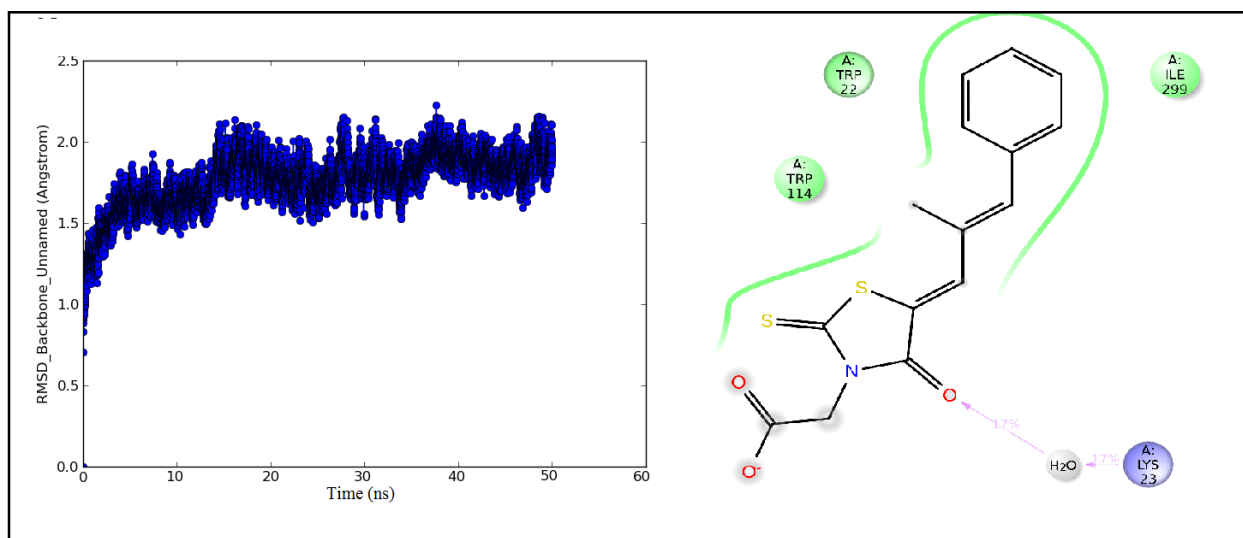

**Figure S11.** RMSD plot and contact summary of ALR1-Epalrestat complex throughout the simulation period of 50 ns.

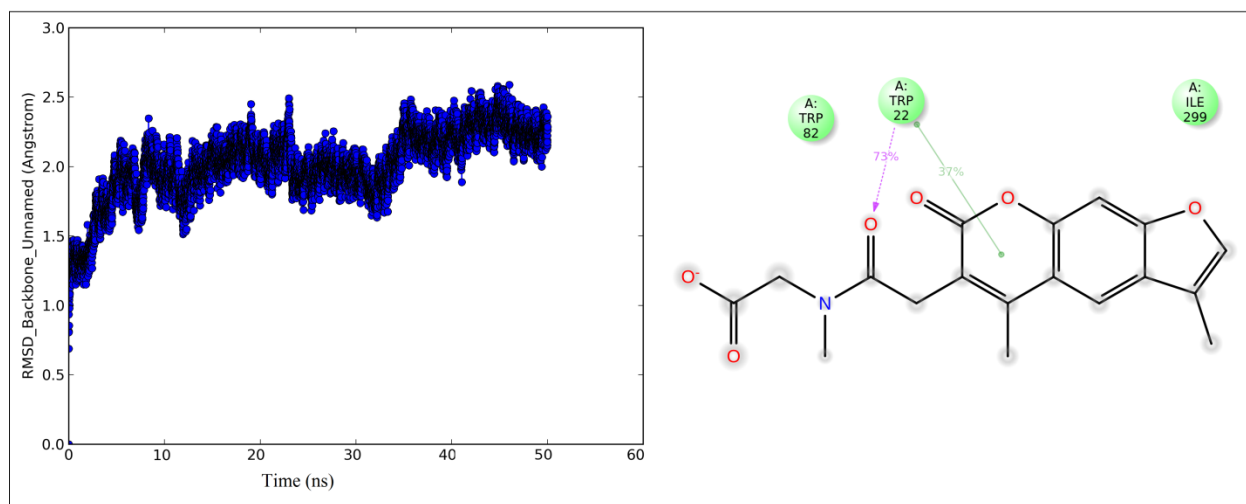

**Figure S12.** RMSD plot and contact summary of ALR1-44771 complex throughout the simulation period of 50 ns.

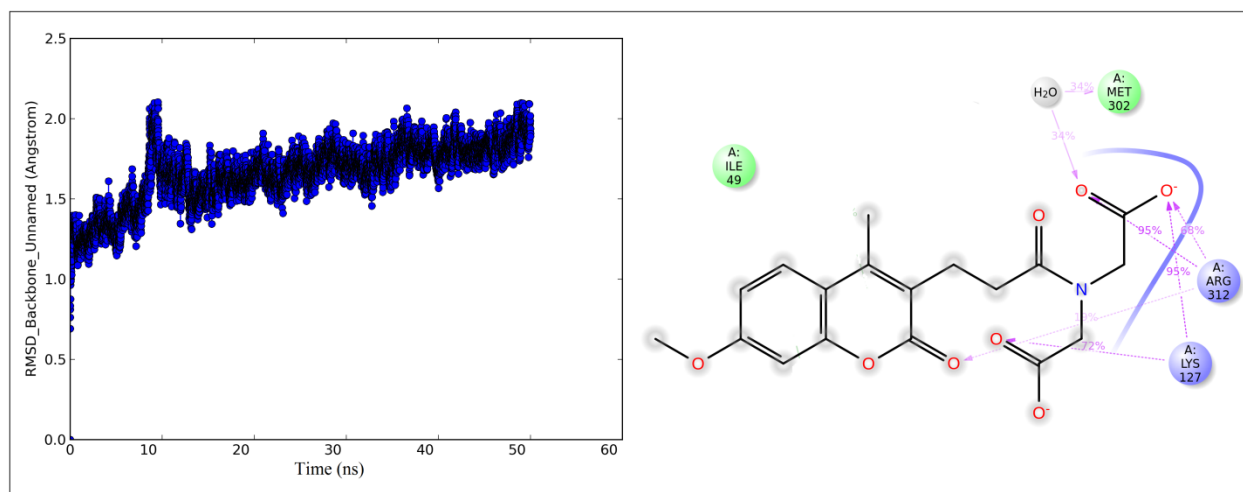

**Figure S13.** RMSD plot and contact summary of ALR1-46041 complex throughout the simulation period of 50 ns.

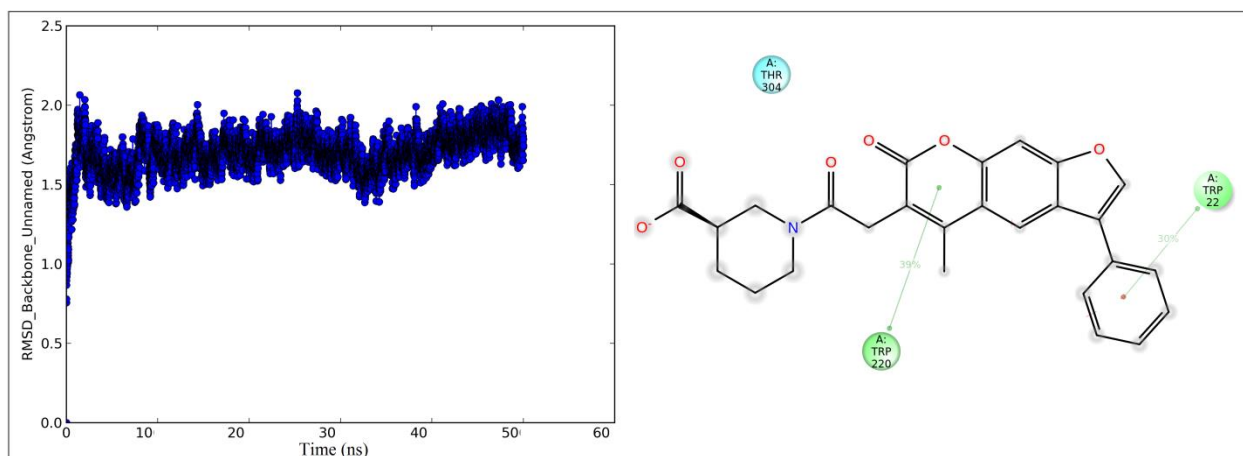

**Figure S14.** RMSD plot and contact summary of ALR1-69620 complex throughout the simulation period of 50 ns.

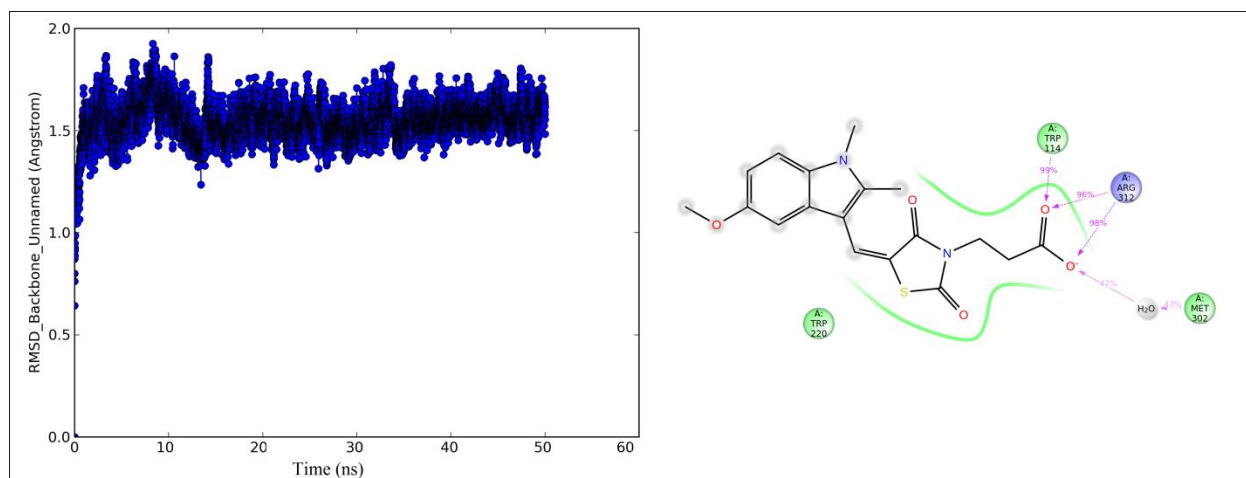

**Figure S15.** RMSD plot and contact summary of ALR1-88220 complex throughout the simulation period of 50 ns.
